# Supplementary material
Source: publisher site journal article supplement (https://www.dovepress.com/article/319236)
Supplement: Supplementary file 1 [file get_supplementary_file.php]

Supplementary material

**Current physiotherapy practice in Intensive Care Units needs cultural and organizational changes: an observational cross-sectional study in two Albanian university hospitals**

Vjollca Shpata1, Manika Kreka1,2, Klejda Tani1

1Faculty of Medical Technical Sciences, University of Medicine in Tirana, Albania

2University Hospital Center of Tirana “Mother Theresa”, Albania

**APENDIX**

**Questionnaire**

**Part 1.A**

|  | YES | NO |
| --- | --- | --- |
| Are you a nurse? |  |  |
| Are you a physiotherapist? |  |  |
| How many years of experience do you have in this profession?  (write the number of years: ______) | | |
| Your last academic degree:   - Bachelor - Master of science - Professional Master - Doctorate degree | | |

**Part 1.B**

If you are a physiotherapist, please answer the following questions:

|  | **YES** | **NO** |
| --- | --- | --- |
| 1. Have you ever worked in an ICU? |  |  |
| 1. Do you work full-time in the ICU? |  |  |
| 1. Do you perform physiotherapy at all ICU patients? |  |  |
| 1. Do you provide after-hours’ service in the ICU during weekdays, weekends, or public holidays? |  |  |
| 1. Do you and your colleagues work in the ICU in a rotational basis? |  |  |
| 1. If you have worked in ICU, how long have you worked there and in which ICU? | | |
| 1. How many hours during the morning shifts of the weekdays do you spend in the ICU? | | |
| 1. How many patients do you treat during your daily stay at the ICU? | | |
| 1. How often do you perform the physiotherapy with a referral from the physician in ICU?   Never Occasionally Always | | |
| 1. How often do you screen ICU patients to determine the plan of interventions?   Never Occasionally Always | | |
| 1. How often do you use methods to determine the patients’ suitability for physiotherapy?   Never Occasionally Always | | |

Notes: “never” (0%), “occasionally” (< 50%) or “always” (> 80%).

**Part 1. C**

| If you are a nurse, answer the question:  Where do you work? (Please, put a tick!) | YES |
| --- | --- |
| Medical-surgical ICU |  |
| Neurosurgical ICU |  |
| Neurological care ICU |  |
| Cardio-surgical ICU |  |
| Cardiac care ICU |  |
| Trauma ICU |  |

**Part 2.**

| Answer the questions: | No | Yes |
| --- | --- | --- |
| Does your unit apply guidelines for physiotherapist consultation at the ICU? |  |  |
| Does your unit follow guidelines for the early mobilization of ICU patients? |  |  |
| Does your unit follow guidelines for the prevention of ventilator-associated pneumonia in the ICU patients? |  |  |
| Does your unit follow protocol for ventilator weaning of ICU patients? |  |  |
| Does your unit follow protocol for respiratory care or respiratory therapy of ICU patients? |  |  |
|  | No* | Yes/specify if available  (poor, good, adequate, very good)* |
| Do you have knowledge of international guidelines for the early mobilization of ICU patients? |  |  |
| Do you have knowledge of evaluation methods of functional ability or mobility status of your ICU patients? |  |  |
| Do you have knowledge of the guidelines for the prevention of VAP (ventilator-associated pneumonia)? |  |  |
| Do you have knowledge of ventilator weaning protocol? |  |  |
| Do you have knowledge of respiratory therapy of ICU patients? |  |  |
| Do you have any post-graduate education/training in intensive care or respiratory care? |  | Specify: |
| Is it necessary to have training in any of the topics mentioned above? |  |  |

*Definitions are presented as a Likert scale, no = no knowledge at all, poor = minimal knowledge, and very good = maximal knowledge on the topic.

**Part 3**

| **Respiratory techniques in patients with an artificial airway** | **Regularly performed** | **Occasionally performed** | **Never performed** |
| --- | --- | --- | --- |
| How often do you perform the patient's body positioning (head-down tilt, side-lying position) or place your patient to postural drainage positions on the bed to facilitate secretions clearance? |  |  |  |
| How often do you participate in the adjustment of mechanical ventilation? |  |  |  |
| How often do you perform airway suctioning from the endotracheal tube or tracheostomy tube? |  |  |  |
| How often do you perform suction of bronchial secretions following respiratory therapy? |  |  |  |
| How often do you make use of physiological saline in the artificial airway during airway suctioning of your ICU patient to facilitate the suctioning? |  |  |  |
| How often do you perform manual or ventilator hyperinflation in your ICU patient? |  |  |  |
| How often do you perform positive end-expiratory pressure (PEEP) ventilation in your ICU patient? |  |  |  |
| How often do you participate in the process of weaning your patient from mechanical ventilation? |  |  |  |
| How often do you perform inspiratory muscle training in your patients? |  |  |  |
| How often do you perform a spontaneous breathing trial in your patients with artificial airways? |  |  |  |
| How often do you perform extubating of the patients? |  |  |  |
| How often do you perform chest wall percussion or manual vibration? |  |  |  |
| **Respiratory techniques in patients without an artificial airway** |  |  |  |
| How often do you assist your patient on passive forced expirations? |  |  |  |
| How often do you assist your patient on Coughing/Huffing? |  |  |  |
| How often do you perform manually assisted coughing? |  |  |  |
| How often do you perform deep breathing exercises in your patient? |  |  |  |
| How often do you perform respiratory muscle training exercises? |  |  |  |
| How often do you perform Incentive spirometry? |  |  |  |
| How often do you perform suctioning of bronchial secretions from the mouth or nose? |  |  |  |
| How often do you use mechanical in-exsufflator in your ICU patients? |  |  |  |
| How often do you perform chest wall percussion or manual/mechanical vibration? |  |  |  |
| How often do you place the mask of oxygen therapy at your ICU patients? |  |  |  |
| How often do you place nebulizers for the humidification of airways at the ICU patients? |  |  |  |
| How often do you place nebulizers to administer bronchodilators or other drugs? |  |  |  |
| How often do you administer and supervise non-invasive ventilation through special masks or helmets? |  |  |  |
| How often do you make the application of periodic continuous positive airways pressure? |  |  |  |
| **Techniques of early mobilization in non-collaborative critically ill patients with an artificial airway** |  |  |  |
| How often do you perform positioning of the patients in the bed (passive turning and moving in the bed) |  |  |  |
| How often do you perform in-bed passive range of all extremities' motions in all physiological directions in your ICU patients? |  |  |  |
| How often do you perform passive vertical mobilization of your patients (tilting table, upright position, standing frame)? |  |  |  |
| How often do you perform the passive transfer of your patients out of bed in a rehabilitation chair? |  |  |  |
| How often do you perform passive cycling with the use of bed pedals exerciser on your ICU patients? |  |  |  |
| How often do you perform electrical muscle stimulation? |  |  |  |
| **Techniques of early mobilization in collaborative patients without an artificial airway** |  |  |  |
| How often do you assist your patients in performing assisted or active cycling using a bed pedal exerciser? |  |  |  |
| How often do you assist your patients in performing active movement exercises in the supine position with manual support? |  |  |  |
| How often do you assist your patients in performing independent mobilization in bed (sitting down upright, turning)? |  |  |  |
| How often do you assist patients in sitting on the edge of the bed with their feet hanging? |  |  |  |
| How often do you assist your patients attempting to sit out of bed, stand up, rest on a foot, stand outside the bed, march on the spot, and walk exercises while standing (standing frame)? |  |  |  |
| How often do you assist your patients in walking away from the bed with and without walking aids? |  |  |  |
| **Techniques of early mobilization in collaborative patients with an artificial airway** |  |  |  |
| How often do you assist your patients in performing assisted or active cycling using a bed pedal exerciser? |  |  |  |
| How often do you assist your patients in performing active movement exercises in the supine position with manual support and upper limb weight training? |  |  |  |
| How often do you assist your patients in performing in bed mobilization (rolling, bridging)? |  |  |  |
| How often do you assist your patients in performing independent mobilization in bed (sitting down upright, turning)? |  |  |  |
| How often do you assist patients in sitting on the edge of the bed with their feet hanging? |  |  |  |
| How often do you attempt to stand up patients and sit them out of bed? |  |  |  |
| How often do you perform chair exercises in your mechanically ventilated patients? |  |  |  |
| How often do you help a patient with an artificial airway ambulate and walk with a portable ventilator? |  |  |  |
| How often do you help a patient with artificial airway to do walking exercises while standing? |  |  |  |
| How often do you make use of standing aids for mechanically ventilated patients? |  |  |  |

Notes: “never performed” (0% of patients), “occasionally performed” (< 50% of patients) or “regularly performed” (> 75% of patients).
